# Supplementary material
Source: publisher figshare collection journal article supplement (https://acs.figshare.com/ndownloader/files/4235995)
Supplement: Supplementary file 1 [file 4235995]

data_jef06
_vrf_PLAT027_jef06
;
PROBLEM: _diffrn_reflns_theta_full (too) Low ............      23.00 Deg. 
RESPONSE: Data were collected to standard resolution of 0.75A, however, 
no significant intensity reflections were found at high resolution and 
data were trunscated
;
# end Validation Reply Form 
_audit_creation_method            SHELXL-97
_chemical_name_systematic
;
 ?
;
_chemical_name_common             ?
_chemical_melting_point           ?
_chemical_formula_moiety          
 'C18 H20 N2 O2 Si2, C6 H6 '
_chemical_formula_sum
 'C24 H26 N2 O2 Si2'
_chemical_formula_weight          430.65
 
loop_
 _atom_type_symbol
 _atom_type_description
 _atom_type_scat_dispersion_real
 _atom_type_scat_dispersion_imag
 _atom_type_scat_source
 'C'  'C'   0.0033   0.0016
 'International Tables Vol C Tables 4.2.6.8 and 6.1.1.4'
 'H'  'H'   0.0000   0.0000
 'International Tables Vol C Tables 4.2.6.8 and 6.1.1.4'
 'N'  'N'   0.0061   0.0033
 'International Tables Vol C Tables 4.2.6.8 and 6.1.1.4'
 'O'  'O'   0.0106   0.0060
 'International Tables Vol C Tables 4.2.6.8 and 6.1.1.4'
 'Si'  'Si'   0.0817   0.0704
 'International Tables Vol C Tables 4.2.6.8 and 6.1.1.4'
 
_symmetry_cell_setting            Triclinic
_symmetry_space_group_name_H-M    P-1
 
loop_
 _symmetry_equiv_pos_as_xyz
 'x, y, z'
 '-x, -y, -z'
 
_cell_length_a                    6.252(4)
_cell_length_b                    9.238(6)
_cell_length_c                    11.558(9)
_cell_angle_alpha                 71.503(16)
_cell_angle_beta                  74.739(16)
_cell_angle_gamma                 82.347(17)
_cell_volume                      609.8(7)
_cell_formula_units_Z             1
_cell_measurement_temperature     173(2)
_cell_measurement_reflns_used     791
_cell_measurement_theta_min       2.54
_cell_measurement_theta_max       25.75
 
_exptl_crystal_description        colorless
_exptl_crystal_colour             plate
_exptl_crystal_size_max           0.41
_exptl_crystal_size_mid           0.39
_exptl_crystal_size_min           0.16
_exptl_crystal_density_meas       none
_exptl_crystal_density_diffrn     1.173
_exptl_crystal_density_method     'not measured'
_exptl_crystal_F_000              228
_exptl_absorpt_coefficient_mu     0.167
_exptl_absorpt_correction_type    multi-scan
_exptl_absorpt_correction_T_min   0.76
_exptl_absorpt_correction_T_max   1
_exptl_absorpt_process_details    'BRUKER SADABS'
 
_exptl_special_details
;
 ?
;
 
_diffrn_ambient_temperature       173(2)
_diffrn_radiation_wavelength      0.71073
_diffrn_radiation_type            MoK\a
_diffrn_radiation_source          'fine-focus sealed tube'
_diffrn_radiation_monochromator   graphite
_diffrn_measurement_device_type   'CCD area detector'
_diffrn_measurement_method        'phi and omega scans'
_diffrn_detector_area_resol_mean  ?
_diffrn_standards_number          ?
_diffrn_standards_interval_count  ?
_diffrn_standards_interval_time   ?
_diffrn_standards_decay_%         ?
_diffrn_reflns_number             3849
_diffrn_reflns_av_R_equivalents   0.0300
_diffrn_reflns_av_sigmaI/netI     0.0568
_diffrn_reflns_limit_h_min        -7
_diffrn_reflns_limit_h_max        7
_diffrn_reflns_limit_k_min        -10
_diffrn_reflns_limit_k_max        10
_diffrn_reflns_limit_l_min        -13
_diffrn_reflns_limit_l_max        13
_diffrn_reflns_theta_min          2.33
_diffrn_reflns_theta_max          25.75
_reflns_number_total              2034
_reflns_number_gt                 1511
_reflns_threshold_expression      >2sigma(I)
 
_computing_data_collection        'Bruker SMART'
_computing_cell_refinement        'Bruker SMART'
_computing_data_reduction         'Bruker SAINT'
_computing_structure_solution     'SHELXS-97 (Sheldrick, 1990)'
_computing_structure_refinement   'SHELXL-97 (Sheldrick, 1997)'
_computing_molecular_graphics     'Bruker SHELXTL'
_computing_publication_material   'Bruker SHELXTL'
 
_refine_special_details
;
 Refinement of F^2^ against ALL reflections.  The weighted R-factor wR and
 goodness of fit S are based on F^2^, conventional R-factors R are based
 on F, with F set to zero for negative F^2^. The threshold expression of
 F^2^ > 2sigma(F^2^) is used only for calculating R-factors(gt) etc. and is
 not relevant to the choice of reflections for refinement.  R-factors based
 on F^2^ are statistically about twice as large as those based on F, and R-
 factors based on ALL data will be even larger.
;
 
_refine_ls_structure_factor_coef  Fsqd
_refine_ls_matrix_type            full
_refine_ls_weighting_scheme       calc
_refine_ls_weighting_details
 'calc w=1/[\s^2^(Fo^2^)+(0.2000P)^2^+0.0000P] where P=(Fo^2^+2Fc^2^)/3'
_atom_sites_solution_primary      direct
_atom_sites_solution_secondary    difmap
_atom_sites_solution_hydrogens    geom
_refine_ls_hydrogen_treatment     constr
_refine_ls_extinction_method      none
_refine_ls_extinction_coef        ?
_refine_ls_number_reflns          2034
_refine_ls_number_parameters      139
_refine_ls_number_restraints      0
_refine_ls_R_factor_all           0.1120
_refine_ls_R_factor_gt            0.0914
_refine_ls_wR_factor_ref          0.2706
_refine_ls_wR_factor_gt           0.2511
_refine_ls_goodness_of_fit_ref    1.067
_refine_ls_restrained_S_all       1.067
_refine_ls_shift/su_max           0.024
_refine_ls_shift/su_mean          0.004
 
loop_
 _atom_site_label
 _atom_site_type_symbol
 _atom_site_fract_x
 _atom_site_fract_y
 _atom_site_fract_z
 _atom_site_U_iso_or_equiv
 _atom_site_adp_type
 _atom_site_occupancy
 _atom_site_symmetry_multiplicity
 _atom_site_calc_flag
 _atom_site_refinement_flags
 _atom_site_disorder_assembly
 _atom_site_disorder_group
Si Si 0.09650(19) 0.28267(15) 0.39150(11) 0.0314(5) Uani 1 1 d . . .
C1 C 0.3291(7) -0.1136(5) 1.0613(4) 0.0263(10) Uani 1 1 d . . .
H1 H 0.2193 -0.1869 1.1018 0.032 Uiso 1 1 calc R . .
C2 C 0.3430(6) -0.0126(5) 0.9415(4) 0.0244(10) Uani 1 1 d . . .
C3 C 0.5058(7) 0.0951(5) 0.8850(4) 0.0244(10) Uani 1 1 d . . .
C4 C 0.2918(7) 0.1132(5) 0.7607(4) 0.0261(10) Uani 1 1 d . . .
C5 C 0.2220(7) 0.1711(5) 0.6459(4) 0.0298(10) Uani 1 1 d . . .
C6 C 0.1659(7) 0.2192(5) 0.5483(4) 0.0323(11) Uani 1 1 d . . .
C7 C -0.2091(9) 0.2859(9) 0.4168(5) 0.070(2) Uani 1 1 d . . .
H7A H -0.2608 0.1834 0.4645 0.105 Uiso 1 1 calc R . .
H7B H -0.2489 0.3176 0.3355 0.105 Uiso 1 1 calc R . .
H7C H -0.2793 0.3582 0.4638 0.105 Uiso 1 1 calc R . .
C8 C 0.2426(10) 0.1400(6) 0.3102(5) 0.0507(14) Uani 1 1 d . . .
H8A H 0.4015 0.1341 0.3072 0.076 Uiso 1 1 calc R . .
H8B H 0.2208 0.1712 0.2246 0.076 Uiso 1 1 calc R . .
H8C H 0.1821 0.0396 0.3562 0.076 Uiso 1 1 calc R . .
C9 C 0.2027(9) 0.4743(6) 0.3072(5) 0.0492(14) Uani 1 1 d . . .
H9A H 0.1298 0.5460 0.3543 0.074 Uiso 1 1 calc R . .
H9B H 0.1714 0.5092 0.2236 0.074 Uiso 1 1 calc R . .
H9C H 0.3634 0.4697 0.2988 0.074 Uiso 1 1 calc R . .
C10 C 0.0436(8) 0.3445(5) 1.0153(4) 0.0361(11) Uani 1 1 d . . .
H10 H 0.0733 0.2381 1.0259 0.043 Uiso 1 1 calc R . .
C11 C 0.2114(8) 0.4448(5) 0.9575(4) 0.0389(12) Uani 1 1 d . . .
H11 H 0.3579 0.4072 0.9278 0.047 Uiso 1 1 calc R . .
C12 C 0.1686(8) 0.5985(5) 0.9425(4) 0.0361(12) Uani 1 1 d . . .
H12 H 0.2859 0.6663 0.9029 0.043 Uiso 1 1 calc R . .
N1 N 0.2084(6) 0.0022(4) 0.8584(3) 0.0282(9) Uani 1 1 d . . .
O1 O 0.4722(5) 0.1775(3) 0.7677(3) 0.0280(8) Uani 1 1 d . . .
 
loop_
 _atom_site_aniso_label
 _atom_site_aniso_U_11
 _atom_site_aniso_U_22
 _atom_site_aniso_U_33
 _atom_site_aniso_U_23
 _atom_site_aniso_U_13
 _atom_site_aniso_U_12
Si 0.0278(8) 0.0435(9) 0.0211(7) -0.0058(6) -0.0098(5) 0.0036(6)
C1 0.027(2) 0.027(2) 0.023(2) -0.0028(18) -0.0066(17) -0.0036(17)
C2 0.020(2) 0.031(2) 0.026(2) -0.0122(19) -0.0087(17) 0.0018(17)
C3 0.025(2) 0.027(2) 0.023(2) -0.0092(18) -0.0081(17) 0.0036(17)
C4 0.022(2) 0.033(2) 0.026(2) -0.0117(19) -0.0086(17) 0.0044(18)
C5 0.029(2) 0.035(3) 0.023(2) -0.0046(19) -0.0094(18) 0.0019(19)
C6 0.024(2) 0.037(3) 0.034(3) -0.007(2) -0.0095(19) 0.0018(19)
C7 0.034(3) 0.123(6) 0.044(3) -0.009(4) -0.015(2) -0.001(3)
C8 0.069(4) 0.047(3) 0.039(3) -0.016(3) -0.021(3) 0.009(3)
C9 0.063(4) 0.041(3) 0.040(3) -0.005(2) -0.019(3) 0.005(3)
C10 0.049(3) 0.029(2) 0.030(3) -0.008(2) -0.011(2) -0.001(2)
C11 0.036(3) 0.042(3) 0.039(3) -0.015(2) -0.008(2) 0.003(2)
C12 0.038(3) 0.038(3) 0.031(3) -0.009(2) -0.003(2) -0.010(2)
N1 0.0264(19) 0.035(2) 0.0233(19) -0.0039(16) -0.0105(15) -0.0027(16)
O1 0.0272(16) 0.0342(17) 0.0214(15) -0.0030(13) -0.0102(12) -0.0014(13)
 
_geom_special_details
;
 All esds (except the esd in the dihedral angle between two l.s. planes)
 are estimated using the full covariance matrix.  The cell esds are taken
 into account individually in the estimation of esds in distances, angles
 and torsion angles; correlations between esds in cell parameters are only
 used when they are defined by crystal symmetry.  An approximate (isotropic)
 treatment of cell esds is used for estimating esds involving l.s. planes.
;
 
loop_
 _geom_bond_atom_site_label_1
 _geom_bond_atom_site_label_2
 _geom_bond_distance
 _geom_bond_site_symmetry_2
 _geom_bond_publ_flag
Si C9 1.845(5) . ?
Si C7 1.853(6) . ?
Si C8 1.862(5) . ?
Si C6 1.868(5) . ?
C1 C3 1.390(6) 2_657 ?
C1 C2 1.390(6) . ?
C1 H1 0.9500 . ?
C2 C3 1.399(6) . ?
C2 N1 1.401(5) . ?
C3 O1 1.383(5) . ?
C3 C1 1.390(6) 2_657 ?
C4 N1 1.303(6) . ?
C4 O1 1.374(5) . ?
C4 C5 1.424(6) . ?
C5 C6 1.200(6) . ?
C7 H7A 0.9800 . ?
C7 H7B 0.9800 . ?
C7 H7C 0.9800 . ?
C8 H8A 0.9800 . ?
C8 H8B 0.9800 . ?
C8 H8C 0.9800 . ?
C9 H9A 0.9800 . ?
C9 H9B 0.9800 . ?
C9 H9C 0.9800 . ?
C10 C11 1.380(7) . ?
C10 C12 1.383(7) 2_567 ?
C10 H10 0.9500 . ?
C11 C12 1.373(6) . ?
C11 H11 0.9500 . ?
C12 C10 1.383(7) 2_567 ?
C12 H12 0.9500 . ?
 
loop_
 _geom_angle_atom_site_label_1
 _geom_angle_atom_site_label_2
 _geom_angle_atom_site_label_3
 _geom_angle
 _geom_angle_site_symmetry_1
 _geom_angle_site_symmetry_3
 _geom_angle_publ_flag
C9 Si C7 111.5(3) . . ?
C9 Si C8 111.0(3) . . ?
C7 Si C8 112.3(3) . . ?
C9 Si C6 107.9(2) . . ?
C7 Si C6 108.2(2) . . ?
C8 Si C6 105.6(2) . . ?
C3 C1 C2 112.3(4) 2_657 . ?
C3 C1 H1 123.8 2_657 . ?
C2 C1 H1 123.8 . . ?
C1 C2 C3 122.4(4) . . ?
C1 C2 N1 128.8(4) . . ?
C3 C2 N1 108.7(3) . . ?
O1 C3 C1 126.9(4) . 2_657 ?
O1 C3 C2 107.8(3) . . ?
C1 C3 C2 125.3(4) 2_657 . ?
N1 C4 O1 116.2(4) . . ?
N1 C4 C5 127.2(4) . . ?
O1 C4 C5 116.6(4) . . ?
C6 C5 C4 179.1(5) . . ?
C5 C6 Si 175.2(4) . . ?
Si C7 H7A 109.5 . . ?
Si C7 H7B 109.5 . . ?
H7A C7 H7B 109.5 . . ?
Si C7 H7C 109.5 . . ?
H7A C7 H7C 109.5 . . ?
H7B C7 H7C 109.5 . . ?
Si C8 H8A 109.5 . . ?
Si C8 H8B 109.5 . . ?
H8A C8 H8B 109.5 . . ?
Si C8 H8C 109.5 . . ?
H8A C8 H8C 109.5 . . ?
H8B C8 H8C 109.5 . . ?
Si C9 H9A 109.5 . . ?
Si C9 H9B 109.5 . . ?
H9A C9 H9B 109.5 . . ?
Si C9 H9C 109.5 . . ?
H9A C9 H9C 109.5 . . ?
H9B C9 H9C 109.5 . . ?
C11 C10 C12 118.8(4) . 2_567 ?
C11 C10 H10 120.6 . . ?
C12 C10 H10 120.6 2_567 . ?
C12 C11 C10 120.6(4) . . ?
C12 C11 H11 119.7 . . ?
C10 C11 H11 119.7 . . ?
C11 C12 C10 120.6(4) . 2_567 ?
C11 C12 H12 119.7 . . ?
C10 C12 H12 119.7 2_567 . ?
C4 N1 C2 103.8(3) . . ?
C4 O1 C3 103.4(3) . . ?
 
_diffrn_measured_fraction_theta_max    0.873
_diffrn_reflns_theta_full              23.00
_diffrn_measured_fraction_theta_full   0.976
_refine_diff_density_max    1.200
_refine_diff_density_min   -0.414
_refine_diff_density_rms    0.158
